CORRECTION

# Correction: Association between Body Mass Index and Prognosis of Colorectal Cancer: A Meta-Analysis of Prospective Cohort Studies

The *PLOS ONE* Staff

[Fig 2](#), “Relative Risks for the Association between Pre-diagnosis BMI and Colorectal Cancer-Specific and All-cause Mortality,” has been truncated. Please view [Fig 2](#) here. The publisher apologizes for the error.

[Fig 3](#), “Relative Risks for the Association between Post-diagnosis BMI and Colorectal Cancer-specific and All-cause Mortality,” has been truncated. Please view [Fig 3](#) here. The publisher apologizes for the error.

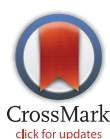

## OPEN ACCESS

**Citation:** The *PLOS ONE* Staff (2016) Correction: Association between Body Mass Index and Prognosis of Colorectal Cancer: A Meta-Analysis of Prospective Cohort Studies. *PLoS ONE* 11(1): e0147456. doi:10.1371/journal.pone.0147456

**Published:** January 14, 2016

**Copyright:** © 2016 The PLOS ONE Staff. This is an open access article distributed under the terms of the [Creative Commons Attribution License](#), which permits unrestricted use, distribution, and reproduction in any medium, provided the original author and source are credited.

# CRC-specific mortality: Underweight vs. Normal weight

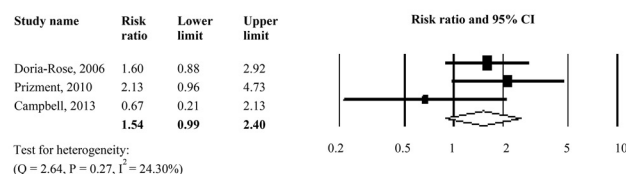

# All-cause Mortality: Underweight vs. Normal weight

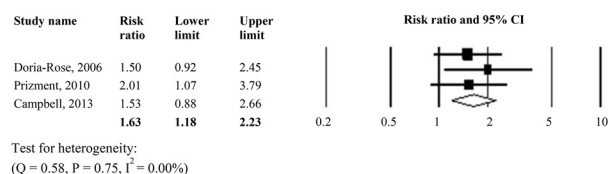

# CRC-specific mortality: Overweight vs. Normal weight

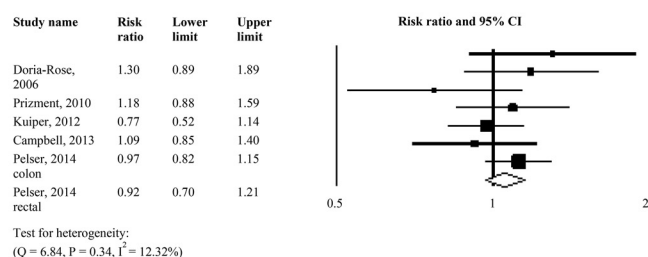

# All-cause mortality: Overweight vs. Normal weight

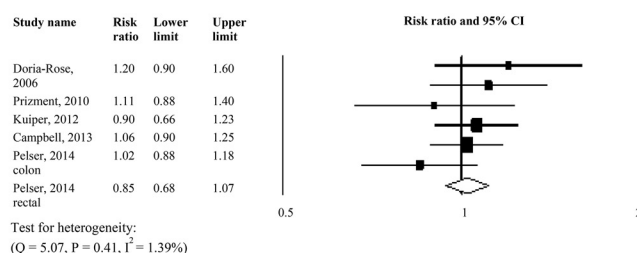

# CRC-specific mortality: Obesity vs. Normal weight

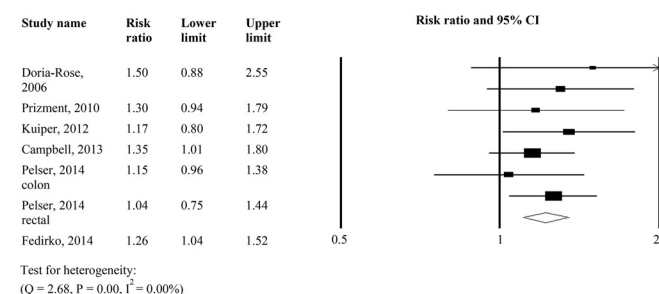

# All-cause mortality: Obesity vs. Normal weight

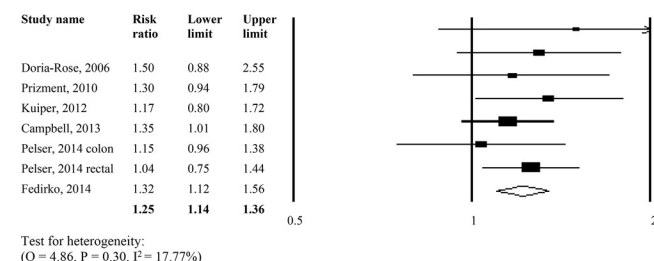

**Fig 2. Relative Risks for the Association between Pre-diagnosis BMI and Colorectal Cancer-Specific and All-cause Mortality.** Association between pre-diagnosis BMI and colorectal cancer-specific mortality and all-cause mortality.

doi:10.1371/journal.pone.0147456.g001

### CRC-specific mortality: Overweight vs. Normal weight

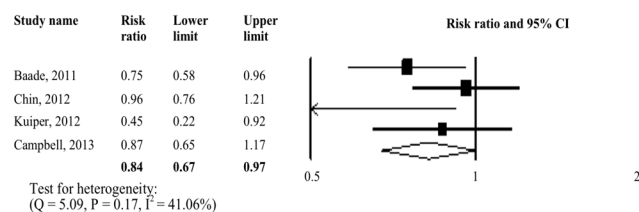

### CRC-specific mortality: Obesity vs. Normal weight

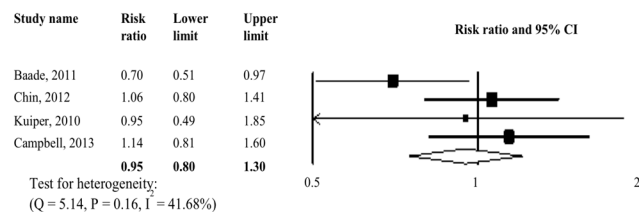

### All-cause Mortality: Underweight vs. Normal weight

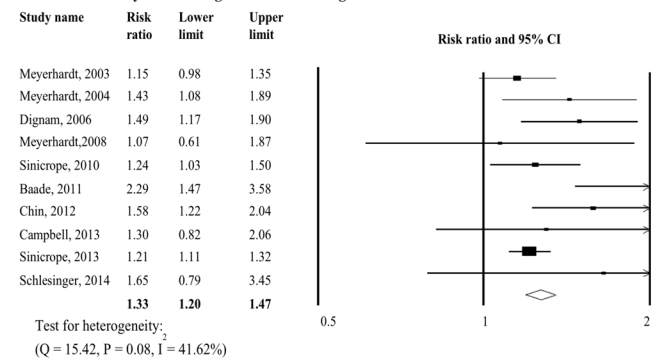

### All-cause mortality: Overweight vs. Normal weight

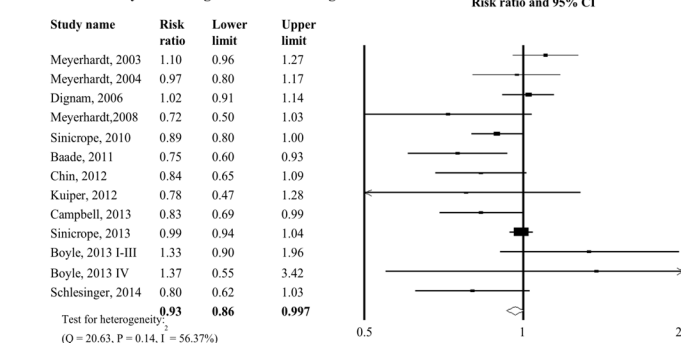

### All-cause mortality: Obesity vs. Normal weight

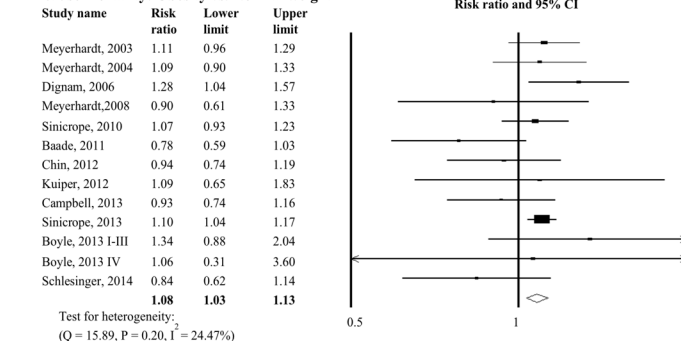

### All-cause mortality: Obesity (BMI ≥ 35) vs. Normal weight

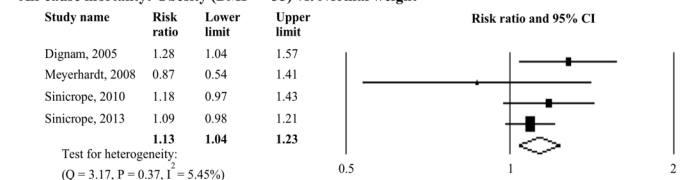

**Fig 3. Relative Risks for the Association between Post-diagnosis BMI and Colorectal Cancer-specific and All-cause Mortality.** Association between post-diagnosis BMI and colorectal cancer-specific mortality and all-cause mortality.

doi:10.1371/journal.pone.0147456.g002

## Reference

1. Lee J, Meyerhardt JA, Giovannucci E, Jeon JY (2015) Association between Body Mass Index and Prognosis of Colorectal Cancer: A Meta-Analysis of Prospective Cohort Studies. PLoS ONE 10(3): e0120706. doi: [10.1371/journal.pone.0120706](https://doi.org/10.1371/journal.pone.0120706) PMID: [25811460](https://pubmed.ncbi.nlm.nih.gov/25811460/)
